# Supplementary material
Source: MDPI journal article supplement (https://www.mdpi.com/2071-1050/9/4/518)
Supplement: s1 [file s1]

Archive with 4 entries (4 files):
- Supplementary material_Table S3.pdf
- Supplementary material_Table S4.pdf
- Supplementary material_Table S1.pdf
- Supplementary material_Table S2.pdf
