# Supplementary material
Source: MDPI journal article supplement (https://www.mdpi.com/2071-1050/9/4/518)
Supplement: s1 [file s1 › Supplementary material_Table S1.pdf]

**Supplementary material Table S1: 139 indicators collected for Sustainability Child Development Index**

| Theme  | Subtheme          | Criteria                    | Indicator                                                                                                           | Data availability |           | Source |
|--------|-------------------|-----------------------------|---------------------------------------------------------------------------------------------------------------------|-------------------|-----------|--------|
|        |                   |                             |                                                                                                                     | Covered country   | Level     |        |
| Health | Nutrition         | Low birth weight            | Percentage of infants born with low birth weight (< 2,500 g)                                                        | 187               | Very high | [1]    |
|        |                   | Overweight and obesity      | Overweight (including obesity, %)                                                                                   | 146               | Medium    |        |
|        |                   |                             | Percentage of 11, 13, 15-year-olds who report that they are overweight or obese according to BMI                    | 32                | Very low  | [2]    |
|        |                   | Breastfeeding               | Exclusive breast feeding < 6 months (%)                                                                             | 167               | High      | [1]    |
|        |                   | Underweight                 | Underweight (moderate and severe, %)                                                                                | 148               | Medium    |        |
|        |                   | Stunting                    | Stunting (moderate and severe, %)                                                                                   | 147               | Medium    |        |
|        |                   | Wasting                     | Wasting (moderate and severe, %)                                                                                    | 147               | Medium    |        |
|        | Child mortality   | Infant mortality            | Infant mortality rate (probability of dying between birth and age 1 per 1,000 live births)                          | 195               | Top       | [1]    |
|        |                   | Under-five mortality        | Under-five mortality rate (probability of dying by age 5 per 1,000 live births)                                     | 195               | Top       |        |
|        |                   | Neonatal mortality          | Neonatal mortality rate (during the first 28 completed days, per 1,000 live births)                                 | 195               | Top       |        |
|        | Injury            | Medically attended injuries | Percentage of 11, 13, 15-year-olds who report at least one medically attended injury in the last 12 months          | 32                | Very low  | [2]    |
|        | Subjective health | Self-rated health           | Percentage of 11, 13, 15-year-olds who rate their own health no more than 'fair' or 'poor'                          | 32                | Very low  |        |
|        |                   |                             | Percentage of 11, 13, 15-year-olds who report multiple health complaints more than once a week (in past six months) | 32                | Very low  |        |

|  |                       |                                                             |                                                                                               |     |           |       |
|--|-----------------------|-------------------------------------------------------------|-----------------------------------------------------------------------------------------------|-----|-----------|-------|
|  | Oral health           | Dental treatments                                           | DMFT (decayed, missing or filled teeth) among 12-year-olds                                    | 180 | Very high | [3]   |
|  | Mental health         | Suicide                                                     | Suicide rate, 15-29 year-olds, per 100,000                                                    | 171 | High      | [4]   |
|  | Hazardous pollutant   | Household and ambient air pollution                         | Mortality rate attributed to household and ambient air pollution (per 100,000 population)     | 172 | High      | [5]   |
|  |                       | PM2.5 exposure                                              | PM2.5 air pollution, population exposed to levels exceeding WHO guideline value (% of total)  | 187 | Very high |       |
|  | HIV                   | HIV prevalence among youth                                  | Estimated percentage of young men and women (aged 15-24) living with HIV                      | 128 | Medium    | [6,7] |
|  |                       | Mother-to child transmission preventing                     | Estimated percentage of pregnant women living with HIV delivering who received ARVs for PMTCT | 83  | Low       | [1]   |
|  | Malaria               | Children under five sleeping under nets                     | Children under 5 sleeping under an insecticide treated net (ITN)                              | 60  | Low       |       |
|  |                       | Children under five fever with treatment                    | Children aged <5 years with fever who received treatment with any antimalarial                | 64  | Low       |       |
|  | Immunization coverage | Measles containing vaccine (MCV) immunization               | Measles (MCV) immunization coverage among 1-year-olds (%)                                     | 195 | Top       | [1]   |
|  |                       | Diphtheria tetanus toxoid and pertussis (DTP3) immunization | Diphtheria tetanus toxoid and pertussis (DTP3) immunization coverage among 1-year-olds (%)    | 195 | Top       |       |
|  |                       | Polio (Pol3)                                                | Polio (Pol3) immunization coverage among 1-year-                                              | 195 | Top       |       |

|  |               |                                             |                                                                                                                     |     |           |     |
|--|---------------|---------------------------------------------|---------------------------------------------------------------------------------------------------------------------|-----|-----------|-----|
|  |               | immunization                                | olds (%)                                                                                                            |     |           |     |
|  |               | Hepatitis B (HepB3) immunization            | Hepatitis B (HepB3) immunization coverage among 1-year-olds (%)                                                     | 185 | Very high |     |
|  |               | Bacillus Calmette-Guérin (BCG) immunization | Bacille Calmette-Guérin (vaccine against tuberculosis) immunization coverage among 1-year-olds (%)                  | 164 | High      |     |
|  | Risk behavior | Tobacco use                                 | Percentage of 11, 13, 15-year-olds who smoke at least once a week                                                   | 32  | Very low  | [2] |
|  |               |                                             | Percentage of 15-year-olds who report first smoking at age or younger                                               | 32  | Very low  | [2] |
|  |               | Alcohol use                                 | Percentage of 15-19 years old heavy episodic drinkers                                                               | 189 | Very high | [5] |
|  |               |                                             | Percentage of 15 -year-olds who report first drunkenness at age 13 or younger                                       | 32  | Very low  | [2] |
|  |               |                                             | Percentage of 11, 13, 15-year-olds who have been drunk at least twice                                               | 32  | Very low  |     |
|  |               | Adolescent fertility                        | Adolescent fertility rate (per 1,000 girls aged 15-19 years)                                                        | 184 | Very high | [8] |
|  |               | Cannabis use                                | Percentage of 15-year-olds who have used cannabis in the last 30 days                                               | 32  | Very low  | [2] |
|  |               |                                             | Percentage of 15-year-olds who have ever used cannabis                                                              | 32  | Very low  |     |
|  |               | Contraceptive prevalence                    | Contraceptive prevalence among girls aged 15-19                                                                     | 87  | Low       | [5] |
|  |               |                                             | Proportion of 15-year-olds having had sexual intercourse that reported using a condom during their last intercourse | 32  | Very low  | [2] |
|  |               |                                             | Percentage of 15-year-olds who used the contraceptive pill at last sexual intercourse                               | 32  | Very low  |     |
|  |               | Prevalence of sexual activity               | Percentage of 15-year-olds who have had sexual intercourse                                                          | 32  | Very low  |     |

|           |                              |                                                   |                                                                                                                                     |     |           |       |
|-----------|------------------------------|---------------------------------------------------|-------------------------------------------------------------------------------------------------------------------------------------|-----|-----------|-------|
|           |                              | in youth                                          |                                                                                                                                     |     |           |       |
|           | Eating and physical behavior | Eating behavior                                   | Percentage of 11, 13, 15-year-olds who eat breakfast every school day                                                               | 32  | Very low  |       |
|           |                              |                                                   | Percentage who eat fruit daily                                                                                                      | 32  | Very low  |       |
|           |                              | Physical activity                                 | Percentage of 11, 13, 15-year-olds who report at least one hour of moderate-to-vigorous physical activity daily                     | 32  | Very low  |       |
|           |                              |                                                   | Comparable estimates of prevalence of insufficient physical activity (adolescents 11-17 years)                                      | 120 | Medium    |       |
|           | Maternal health              | Antenatal care                                    | Percentage of women aged 15-49 years attended at least four during pregnancy by skilled health personnel (doctor, nurse or midwife) | 149 | Medium    | [1]   |
|           |                              | Maternal mortality                                | Maternal mortality ratio (MMR, maternal deaths per 100,000 live births)                                                             | 183 | Very high |       |
|           |                              | Skilled attendant at birth                        | Percentage of births attended by skilled health personnel (doctor, nurse or midwife)                                                | 168 | High      |       |
|           | Health expenditure           | Public health expenditure                         | Public health expenditure as % of total health expenditure                                                                          | 190 | Very high | [5,8] |
|           | Water and sanitation         | Access to improved sanitation facilities coverage | Improved sanitation facilities (% of population with access)                                                                        | 191 | Very high | [8]   |
|           |                              | Access to improved drinking water coverage        | Population using improved drinking-water sources (%)                                                                                | 193 | Very high | [1,5] |
| Education | School attainment            | Mathematical literacy                             | Average achievement in mathematical literacy                                                                                        | 59  | Low       | [10]  |
|           |                              | Reading                                           | Average achievement in reading literacy                                                                                             | 59  | Low       |       |

|  |                           |                               |                                                                                                           |     |           |      |
|--|---------------------------|-------------------------------|-----------------------------------------------------------------------------------------------------------|-----|-----------|------|
|  |                           | literacy                      |                                                                                                           |     |           |      |
|  |                           | Overall literacy              | Youth literacy rate, population 15-24 years, both sexes (%)                                               | 151 | High      | [11] |
|  |                           | Repetition                    | Repetition rate in primary education (all grades), both sexes (%)                                         | 165 | High      |      |
|  | Transition to employment  | Idle youth                    | Proportion of 15-29 year olds not in employment, education or training (NEET)                             | 42  | Very low  | [12] |
|  | Subjective evaluation     | Satisfaction of school        | Percentage of young people ‘liking school a lot’                                                          | 32  | Very low  | [2]  |
|  |                           |                               | Percentage of 11, 13, 15-year-olds who report good or very good perceived school performance              | 32  | Very low  |      |
|  |                           | Pressure from school work     | Percentage of 11, 13, 15-year-olds who feel pressured by schoolwork                                       | 32  | Very low  |      |
|  | Completion of education   | Primary school completion     | Gross graduation ratio from primary education, both sexes                                                 | 107 | Medium    | [11] |
|  |                           | Secondary school completion   | Gross graduation ratio from lower secondary education, both sexes (%)                                     | 140 | Medium    |      |
|  |                           | Tertiary school completion    | Gross graduation ratio from first degree programmes (ISCED 6 and 7) in tertiary education, both sexes (%) | 120 | Medium    |      |
|  | Attendance of education   | Enrolment in primary school   | Gross enrolment ratio, primary, both sexes (%)                                                            | 191 | Very high | [11] |
|  |                           | Enrolment in secondary school | Gross enrolment ratio, secondary, both sexes (%)                                                          | 188 | Very high |      |
|  |                           | Enrolment in tertiary school  | Gross enrolment ratio, tertiary, both sexes (%)                                                           | 175 | Very high |      |
|  | Early childhood education | Enrolment of kindergarten     | Gross enrolment ratio, pre-primary, both sexes (%)                                                        | 187 | Very high |      |
|  | Parents’ educatio         | Parent’s                      | Percentage of children in households in which                                                             | 41  | Very low  | [13] |

|        |                                 |                                    |                                                                                                                      |     |           |          |
|--------|---------------------------------|------------------------------------|----------------------------------------------------------------------------------------------------------------------|-----|-----------|----------|
|        | nal qualification               | formal educational level           | household head has a secondary education                                                                             |     |           |          |
|        | Government support on education | Public expenditure on education    | Government expenditure on education as % of GDP                                                                      | 179 | Very high | [11]     |
|        | Provision of vocational school  | Attendance of vocational education | Young VET graduates in further education and training (%)                                                            | 33  | Very low  | [14]     |
|        |                                 |                                    | Initial-education-and-training students as a % of all upper-secondary students                                       | 33  | Very low  |          |
|        |                                 |                                    | Adults in lifelong learning (%)                                                                                      | 33  | Very low  |          |
|        | Gender equality                 | Gender equality in enrolment       | Gross enrolment ratio, pre-primary, gender parity index (GPI)                                                        | 176 | Very high | [11]     |
|        |                                 |                                    | Gross enrolment ratio, primary, gender parity index (GPI)                                                            | 190 | Very high |          |
|        |                                 |                                    | Gross enrolment ratio, secondary, gender parity index (GPI)                                                          | 187 | Very high |          |
|        |                                 |                                    | Gross enrolment ratio, tertiary, gender parity index (GPI)                                                           | 177 | Very high |          |
|        |                                 | Gender equality in graduation      | Gross graduation ratio from primary education, gender parity index (GPI)                                             | 134 | Medium    |          |
|        |                                 |                                    | Gross graduation ratio from lower secondary education, gender parity index (GPI)                                     | 134 | Medium    |          |
|        |                                 |                                    | Gross graduation ratio from first degree programmes (ISCED 6 and 7) in tertiary education, gender parity index (GPI) | 137 | Medium    |          |
|        |                                 | Gender equality in youth literacy  | Youth literacy rate, population 15-24 years, gender parity index (GPI)                                               | 152 | High      |          |
| Safety | Violence and crime              | Juvenile delinquency               | Juveniles held in prisons, penal institutions or correctional institutions                                           | 108 | Medium    | [15][15] |

|  |                    |                                  |                                                                                                                                                                                                                                                                                                |     |          |      |
|--|--------------------|----------------------------------|------------------------------------------------------------------------------------------------------------------------------------------------------------------------------------------------------------------------------------------------------------------------------------------------|-----|----------|------|
|  |                    |                                  | Persons prosecuted, % of juvenile                                                                                                                                                                                                                                                              | 80  | Low      |      |
|  |                    |                                  | Persons convicted, % of juvenile                                                                                                                                                                                                                                                               | 80  | Low      |      |
|  |                    |                                  | Juveniles brought into formal contact with the police and/or criminal justice system, all crimes                                                                                                                                                                                               | 108 | Medium   |      |
|  |                    |                                  | Juveniles convicted, all crimes                                                                                                                                                                                                                                                                | 92  | Low      |      |
|  |                    | Bully in school                  | Percentage of 11, 13, 15-year-olds who have bullied others at school at least twice in the past couple of months                                                                                                                                                                               | 32  | Very low | [2]  |
|  |                    | Fighting                         | Percentage of 11, 13, 15-year olds who have been involved in a physical fight at least three times in the last months                                                                                                                                                                          | 32  | Very low |      |
|  | Violence and crime | Being bullied                    | Percentage of 11, 13, 15-year-olds who have been bullied at school at least twice in the past couple of months                                                                                                                                                                                 | 32  | Very low | [2]  |
|  |                    | Criminal victimization           | Intentional homicide count and rate per 100,000 population                                                                                                                                                                                                                                     | 195 | Top      | [15] |
|  |                    |                                  | Assault and major assault rates in different countries (police recorded assaults/100,000 population)                                                                                                                                                                                           | 128 | Medium   |      |
|  |                    | Family violence                  | Percentage of boys and men 15-49 years old who consider a husband to be justified in hitting or beating his wife for at least one of the specified reasons, i.e., if his wife burns the food, argues with him, goes out without telling him, neglects the children or refuses sexual relations | 62  | Low      | [1]  |
|  |                    | Sexual violence against children | Total sexual offences against children at the national level, police-recorded offences, rate per 100,000 children aged 17 or under                                                                                                                                                             | 102 | Medium   | [15] |
|  |                    |                                  | Sexual violence prevalence among girls and boys aged 15 to 19 years                                                                                                                                                                                                                            | 40  | Very low | [1]  |

|                 |                                   |                                                                 |                                                                                                                                        |     |           |      |
|-----------------|-----------------------------------|-----------------------------------------------------------------|----------------------------------------------------------------------------------------------------------------------------------------|-----|-----------|------|
|                 | Child care arrangement            | Formal care                                                     | Formal childcare by age group and duration - % over the population of each age group (0-3, 30 hours per week or over)                  | 31  | Very low  | [16] |
|                 |                                   |                                                                 | Formal childcare by age group and duration - % over the population of each age group (3-minimum school age, 30 hours per week or over) | 31  | Very low  |      |
|                 | Violent discipline                | Psychological aggression and/or punishment                      | Percentage of children 2-14 years old who experience any violent discipline (psychological aggression and/or physical punishment)      | 61  | Low       | [1]  |
|                 | Birth registration                | Registration of newborns                                        | Birth registration rate                                                                                                                | 166 | High      |      |
|                 | Child labor                       | Children involved in child labor                                | Percentage of children 5-14 years old involved in child labor                                                                          | 112 | Medium    |      |
|                 | Child marriage                    | Children married or in union                                    | Percentage of women aged 20 to 24 years who were first married or in union before age 18                                               | 123 | Medium    |      |
|                 | Female genital mutilation         | Girls received genital mutilation                               | Percentage of girls aged 0 to 14 years who have undergone FGM/C (as reported by their mothers)                                         | 19  | Very low  |      |
|                 | Demographic structure             | Sex ratio                                                       | Sex ratio at birth                                                                                                                     | 191 | Very high | [17] |
| Economic status | Relative household income poverty | Children living in households with income under national median | Percentage of children living in households with equivalent income lower than 50% of national median                                   | 39  | Very low  | [12] |
|                 |                                   |                                                                 | Poverty gap at national poverty lines (%)                                                                                              | 82  | Low       | [8]  |

|  |                         |                                     |                                                                                                                                        |     |           |      |
|--|-------------------------|-------------------------------------|----------------------------------------------------------------------------------------------------------------------------------------|-----|-----------|------|
|  | Household without job   | Children living in jobless families | Proportion of children living in jobless families                                                                                      | 31  | Very low  | [12] |
|  | Material deprivation    | Fewer than ten books                | Percentage of children age 15 reporting less than 10 books in the home                                                                 | 28  | Very low  | [18] |
|  |                         | Few educational resource            | Percentage of children age 15 reporting less than six educational possessions                                                          | 28  | Very low  |      |
|  |                         | Low family affluence                | Percentage of children age 11, 13 and 15 reporting low family affluence                                                                | 28  | Very low  |      |
|  |                         | Lack of needed items                | Material Deprivation rate, 0-18 years old                                                                                              | 34  | Very low  | [16] |
|  | Housing quality         | Electricity coverage                | Access to electricity (% of population)                                                                                                | 191 | Very high | [8]  |
|  |                         | Housing quality                     | Share of total population living in a dwelling with a leaking roof, damp walls, floors or foundation, or rot in window frames of floor | 34  | Very low  | [16] |
|  |                         |                                     | Share of total population having neither a bath, nor a shower in their dwelling                                                        | 34  | Very low  |      |
|  |                         |                                     | Share of total population not having indoor flushing toilet for the sole use of their household                                        | 34  | Very low  |      |
|  |                         | Crowded household                   | Overcrowding rate, 0-18 years old                                                                                                      | 33  | Very low  |      |
|  | Macroeconomic situation | Overall unemployment                | Unemployment, total (% of total labor force) (modeled ILO estimate)                                                                    | 170 | High      | [8]  |
|  |                         | Youth unemployment                  | Youth unemployment rate (% of total labor force ages 15-24)                                                                            | 170 | High      |      |

|              |                     |                                   |                                                                                                      |     |           |         |
|--------------|---------------------|-----------------------------------|------------------------------------------------------------------------------------------------------|-----|-----------|---------|
|              |                     | Income equality at societal level | Income Gini coefficient                                                                              | 156 | High      | [19]    |
|              |                     | National income                   | GNI per capita, Purchasing power parity (current international \$)                                   | 183 | Very high | [8]     |
|              |                     | National debts                    | Public debt as percentage of GDP                                                                     | 179 | Very high | [17]    |
| Relationship | Family relationship | Relation with parents             | Percentage of children who report eating the main meal of the day with parents more than once a week | 29  | Very low  | [10,18] |
|              |                     |                                   | Percentage of children who report that parents spend time 'just talking' to them                     | 29  | Very low  |         |
|              |                     |                                   | Percentage of 11, 13, 15-year-olds who find it easy to talk to their mothers                         | 32  | Very low  | [2]     |
|              |                     |                                   | Percentage of 11, 13, 15-year-olds who find it easy to talk to their fathers                         | 32  | Very low  |         |
|              |                     | Family engagement                 | Getting together with relatives every week, 16-19 years old                                          | 28  | Very low  | [16]    |
|              |                     | Family structure                  | Percentage of children living in single-parent family                                                | 61  | Low       | [2,13]  |
|              |                     |                                   | Percentage of children living in stepfamily                                                          | 34  | Very low  | [18]    |
|              |                     |                                   | Percentage of Children Living with Probable Extended Family (Adults in Addition to Parents)          | 41  | Very low  | [13]    |

|               |                                    |                                       |                                                                                              |     |          |         |
|---------------|------------------------------------|---------------------------------------|----------------------------------------------------------------------------------------------|-----|----------|---------|
|               |                                    |                                       | Percentage of children living in both-parents family                                         | 61  | Low      | [2,13]  |
|               | Community relationship             | Social capital                        | Social Capital Ranking                                                                       | 140 | Medium   | [20,21] |
|               | Peer relationship                  | Kind and helpful peer                 | Percentage of 11, 13 and 15 year-olds who report finding their peers 'kind and helpful'      | 32  | Very low | [2]     |
|               |                                    | Peer engagement                       | Percentage of 11, 13, 15-year-olds who have three or more close friends of the same gender   | 32  | Very low |         |
|               |                                    |                                       | Percentage of 11, 13, 15-year-olds who spend four or more evenings per week out with friends | 32  | Very low |         |
|               |                                    |                                       | Percentage of 11, 13, 15-year-olds who have daily EMC with friends                           | 32  | Very low |         |
|               |                                    |                                       | Getting together with friends every week, 16-19 years old                                    | 28  | Very low | [16]    |
| Participation | Engagement of community activities | Participation of community activities | Participation of young people in informal voluntary activities, 16-19 years old              | 27  | Very low |         |
|               | Voting of presidential elections   | Youth voting engagement               | Voter turnout in latest parliamentary election                                               | 29  | Very low | [12]    |
|               | Social media connection            | Telephone access in home              | Proportion of households with mobile phone                                                   | 64  | Low      | [22]    |
|               |                                    |                                       | Proportion of households with fixed line phone                                               | 65  | Low      |         |
|               |                                    | Internet access in home               | Proportion of households with internet access at home                                        | 138 | Medium   |         |
|               |                                    | Access to public media                | Proportion of households with computer                                                       | 126 | Medium   |         |
|               |                                    |                                       | Proportion of households with radio                                                          | 55  | Low      |         |

|                       |                              |                                        |                                                                    |     |           |      |
|-----------------------|------------------------------|----------------------------------------|--------------------------------------------------------------------|-----|-----------|------|
|                       |                              |                                        | Proportion of households with TV                                   | 66  | Low       |      |
| Environmental aspects | Fresh water vulnerability    | Risk of depleting freshwater resources | Water depletion index (WDI)                                        | 192 | Very high | [23] |
|                       | Renewable energy consumption | Consumption of renewable energy        | Renewable energy consumption (% of total final energy consumption) | 180 | Very high | [8]  |

## References:

1. UNICEF (United Nations Children's Fund). Childinfo: Monitoring the Situation of Children and Women. Available online: <http://www.childinfo.org/> (accessed on 11 March 2017).
2. WHO (World Health Organization) Regional Office for Europe. *Social Determinants of Health and Well-being among Young People*; WHO Regional Office for Europe: Copenhagen, Denmark, 2012. ([http://www.euro.who.int/\\_data/assets/pdf\\_file/0003/163857/Social-determinants-of-health-and-well-being-among-young-people.pdf](http://www.euro.who.int/_data/assets/pdf_file/0003/163857/Social-determinants-of-health-and-well-being-among-young-people.pdf))
3. Malmö University. Oral Health Database. Available online: <http://www.mah.se/capp/> (accessed on 25 August 2016).
4. WHO (World Health Organization). *Preventing Suicide: A Global Imperative*; WHO: Luxembourg, 2014. ([http://apps.who.int/iris/bitstream/10665/131056/1/9789241564779\\_eng.pdf](http://apps.who.int/iris/bitstream/10665/131056/1/9789241564779_eng.pdf))
5. WHO (World Health Organization). *Preventing Suicide: A Global Imperative*; WHO: Luxembourg, 2014. ([http://apps.who.int/iris/bitstream/10665/131056/1/9789241564779\\_eng.pdf](http://apps.who.int/iris/bitstream/10665/131056/1/9789241564779_eng.pdf))
6. UNICEF (United Nations Children's Fund). *The State of the World's Children 2016: A Fair Chance for Every Child*; UNICEF: New York, NY, USA, 2016. ([https://www.unicef.org/publications/files/UNICEF\\_SOWC\\_2016.pdf](https://www.unicef.org/publications/files/UNICEF_SOWC_2016.pdf))
7. UNICEF (United Nations Children's Fund). *The state of the World's Children 2015: Reimagine the Future, Innovation for Every Child*; UNICEF: New York, NY, USA, 2014. ([https://www.unicef.org/publications/files/SOWC\\_2015\\_Summary\\_and\\_Tables.pdf](https://www.unicef.org/publications/files/SOWC_2015_Summary_and_Tables.pdf))
8. World Bank. World Bank Open Data. Available online: <http://data.worldbank.org/> (accessed on 11 March 2017).
9. WHO (World Health Organization). *Global Status Report on Noncommunicable Diseases 2014*; WHO: Geneva, Switzerland, 2014. ([http://apps.who.int/iris/bitstream/10665/148114/1/9789241564854\\_eng.pdf?ua=1](http://apps.who.int/iris/bitstream/10665/148114/1/9789241564854_eng.pdf?ua=1))
10. OECD (Organization for Economic Co-operation and Development). *PISA 2012 Results in Focus*; OECD: Paris, France, 2013. (<https://www.oecd.org/pisa/keyfindings/pisa-2012-results-overview.pdf>)
11. UNESCO (United Nations Educational, Scientific and Cultural Organization). UIS.Stat. Available online: <http://data.uis.unesco.org/> (accessed on 11 August 2016).
12. OECD (Organization for Economic Co-operation and Development). OECD Family Database. Available online:

<http://www.oecd.org/els/family/database.htm> (accessed on 21 October 2015).

13. Child Trends. *World Family Mapping: Family Change and Child Well-Being Outcomes*; Child Trends: Bethesda, MD, USA, 2014. ([http://worldfamilymap.org/2014/wp-content/uploads/2014/06/WFM-2014-Final\\_ForWeb.pdf](http://worldfamilymap.org/2014/wp-content/uploads/2014/06/WFM-2014-Final_ForWeb.pdf))
14. European Centre for the Development of Vocational Training. *The Benefits of Vocational Education and Training*; Publications Office of the European Union: Luxembourg, 2011. ([www.cedefop.europa.eu/files/5510\\_en.pdf](http://www.cedefop.europa.eu/files/5510_en.pdf))
15. UNODC (United Nations Office on Drugs and Crime). Data and Analysis Statistics. Available online: <https://www.unodc.org/unodc/en/data-and-analysis/statistics/index.html> (accessed on 12 March 2017).
16. European Commission. Eurostat. Available online: <http://ec.europa.eu/eurostat/data/database> (accessed on 19 October 2015).
17. CIA (Central Intelligence Agency). Sex Ratio at Birth. Available online: <https://www.cia.gov/library/publications/the-world-factbook/fields/2018.html> (accessed on 20 March 2017).
18. UNICEF (United Nations Children's Fund). *An Overview of Child Well-Being in Rich Countries*; UNICEF: Florence, Italy, 2007. ([https://www.unicef-irc.org/publications/pdf/rc7\\_eng.pdf](https://www.unicef-irc.org/publications/pdf/rc7_eng.pdf))
19. UNDP (United Nations Development Programme). Income Gini Coefficient. Available online: <http://hdr.undp.org/en/content/income-gini-coefficient> (accessed on 11 March 2016).
20. Legatum Institute. *The Legatum Prosperity Index 2016*; The Legatum Institute Foundation: London, UK, 2016. ([http://www.prosperity.com/application/files/1614/7809/7434/Legatum\\_Prosperty\\_Index\\_2016.pdf](http://www.prosperity.com/application/files/1614/7809/7434/Legatum_Prosperty_Index_2016.pdf))
21. Legatum Institute Foundation The Legatum Prosperity Index 2016 <http://www.prosperity.com/> (accessed 11 Mar 2017).
22. ITU (International Telecommunication Union). ITU—Statistics. Available online: <http://www.itu.int/en/ITU-D/Statistics/Pages/stat/default.aspx> (accessed 19 Mar 2017).
23. Berger, M.; Van Der Ent, R.; Eisner, S.; Bach, V.; Finkbeiner, M. Water accounting and vulnerability evaluation (WAVE): Considering atmospheric evaporation recycling and the risk of freshwater depletion in water footprinting. *Environ. Sci. Technol.* **2014**, *48*, 4521–4528.
