# Supplementary material
Source: MDPI journal article supplement (https://www.mdpi.com/2071-1050/9/4/518)
Supplement: s1 [file s1 › Supplementary material_Table S2.pdf]

Supplementary material Table S2: The relation of the initial indicator set of the SCDI to the SDG indicator development

| SCDI theme | SCDI subtheme       | SDG | SCDI criteria                       | SDG target | SCDI indicator                                                                               | Data availability |           | Tier for SDG Indicator | Source                                    |
|------------|---------------------|-----|-------------------------------------|------------|----------------------------------------------------------------------------------------------|-------------------|-----------|------------------------|-------------------------------------------|
|            |                     |     |                                     |            |                                                                                              | Covered country   | Level     |                        |                                           |
| Health     | Nutrition           | 2   | Low birth weight                    | 2.1        | Percentage of infants born with low birth weight (< 2500 g)                                  | 182               | Very high | -                      | UNICEF [1]                                |
|            |                     |     | Overweight and obesity              | 2.2        | Overweight (including obesity, %)                                                            | 146               | Medium    | I                      |                                           |
|            |                     |     | Breast feeding                      | 2.1        | Exclusive breastfeeding < six months (%)                                                     | 167               | High      | -                      |                                           |
|            |                     |     | Underweight                         | 2.2        | Underweight (moderate and severe, %)                                                         | 155               | Medium    | I                      |                                           |
|            | Child mortality     | 3   | Infant mortality                    | 3.2        | Infant mortality rate (probability of dying between birth and age one per 1000 live births)  | 195               | Top       | -                      |                                           |
|            |                     |     | Under-five mortality                |            | Under-five mortality rate (probability of dying by age five per 1000 live births)            | 195               | Top       | I                      |                                           |
|            |                     |     | Neonatal mortality                  |            | Neonatal mortality rate (during the first 28 completed days, per 1000 live births)           | 195               | Top       | I                      |                                           |
|            | Oral health         | 3   | Dental treatments                   | 3.4        | DMFT (decayed, missing or filled teeth) among 12-year-olds                                   | 180               | Very high | -                      | Malmö University Oral Health Database [2] |
|            | Mental health       | 3   | Suicide                             | 3.4        | Suicide rate, 15-29 year-olds, per 100,000                                                   | 171               | Very high | II                     | WHO [3]                                   |
|            | Hazardous pollutant | 3   | Household and ambient air pollution | 3.9        | Mortality rate attributed to household and ambient air pollution (per 100,000 population)    | 172               | High      | I                      | WHO [4]                                   |
|            |                     | 11  | PM2.5 air pollution                 | 11.6       | PM2.5 air pollution, population exposed to levels exceeding WHO guideline value (% of total) | 185               | Very high | I                      |                                           |

Supplementary material Table S2: The relation of the initial indicator set of the SCDI to the SDG indicator development (cont.)

| SCDI theme | SCDI subtheme         | SDG | SCDI criteria                                               | SDG target | SCDI indicator                                                                                                                      | Data availability |           | Tier for SDG Indicator | Source                |
|------------|-----------------------|-----|-------------------------------------------------------------|------------|-------------------------------------------------------------------------------------------------------------------------------------|-------------------|-----------|------------------------|-----------------------|
|            |                       |     |                                                             |            |                                                                                                                                     | Covered country   | Level     |                        |                       |
| Health     | Immunization coverage | 3   | Measles containing vaccine (MCV) immunization               | 3.8        | Measles (MCV) immunization coverage among one-year-olds (%)                                                                         | 195               | Top       | -                      | UNICEF [1]            |
|            |                       |     | Diphtheria tetanus toxoid and pertussis (DTP3) immunization |            | Diphtheria tetanus toxoid and pertussis (DTP3) immunization coverage among one-year-olds (%)                                        | 195               | Top       | -                      |                       |
|            |                       |     | Polio (Pol3) immunization                                   |            | Polio (Pol3) immunization coverage among one-year-olds (%)                                                                          | 195               | Top       | -                      |                       |
|            |                       |     | Hepatitis B (HepB3) immunization                            |            | Hepatitis B (HepB3) immunization coverage among one-year-olds (%)                                                                   | 186               | Very high | -                      |                       |
|            |                       |     | Bacillus Calmette-Guérin (BCG) immunization                 |            | BacilleCalmette-Guérin (vaccine against tuberculosis) immunization coverage among one-year-olds (%)                                 | 163               | High      | -                      |                       |
|            | Risk behavior         | 3   | Alcohol use                                                 | 3.5        | Percentage of 15-19 years old heavy episodic drinkers                                                                               | 189               | Very high | I                      | WHO; World Bank [4,5] |
|            |                       |     | Adolescent fertility                                        | 3.7        | Adolescent fertility rate (per 1000 girls aged 15-19 years)                                                                         | 184               | Very high | II                     |                       |
|            | Physical behavior     | 3   | Physical activity                                           | 3.4        | Comparable estimates of prevalence of insufficient physical activity (adolescents 11-17 years)                                      | 120               | Medium    | -                      | WHO [6]               |
|            | Maternal health       | 3   | Antenatal care                                              | 3.1        | Percentage of women aged 15-49 years attended at least once during pregnancy by skilled health personnel (doctor, nurse or midwife) | 166               | High      | -                      | UNICEF [1]            |
|            |                       |     | Maternal mortality                                          |            | Maternal mortality ratio (MMR, maternal deaths per 100 000 live births)                                                             | 183               | Very high | II                     |                       |
|            |                       |     | Skilled attendant at birth                                  |            | Percentage of births attended by skilled health personnel (doctor, nurse or midwife)                                                | 180               | Very high | I                      |                       |

Supplementary material Table S2: The relation of the initial indicator set of the SCDI to the SDG indicator development (cont.)

| SCDI theme | SCDI subtheme           | SDG | SCDI criteria                             | SDG target | SCDI indicator                                                                                            | Data availability |           | Tier for SDG Indicator | Source                          |
|------------|-------------------------|-----|-------------------------------------------|------------|-----------------------------------------------------------------------------------------------------------|-------------------|-----------|------------------------|---------------------------------|
|            |                         |     |                                           |            |                                                                                                           | Covered country   | Level     |                        |                                 |
| Health     | Health expenditure      | 1   | Public health expenditure                 | 1.a        | Public health expenditure as % of total health expenditure                                                | 190               | Very high | II                     | WHO; World Bank [4,5]           |
|            | Water and sanitation    | 6   | Access to improved sanitation facilities  | 6.2        | Improved sanitation facilities (% of population with access)                                              | 191               | Very high | I                      | UNICEF; WHO; World Bank [1,4,5] |
|            |                         |     | Access to improved drinking-water sources | 6.1        | Population using improved drinking-water sources (%)                                                      | 193               | Very high | I                      |                                 |
|            | HIV                     | 3   | HIV prevalence among youth                | 3.3        | Estimated percentage of young men and women (aged 15-24) living with HIV                                  | 128               | Medium    | II                     | UNICEF [7,8]                    |
| Education  | School attainment       | 4   | Overall literacy                          | 4.6        | Youth literacy rate, population 15-24 years, both sexes (%)                                               | 151               | High      | II                     | UNESCO [9]                      |
|            |                         |     | Repetition                                | 4.1        | Repetition rate in primary education (all grades), both sexes (%)                                         | 152               | High      | -                      |                                 |
|            | Completion of education | 4   | School completion                         | 4.1        | Gross graduation ratio from primary education, both sexes                                                 | 107               | Medium    | -                      |                                 |
|            |                         |     |                                           | 4.1        | Gross graduation ratio from lower secondary education, both sexes (%)                                     | 114               | Medium    | -                      |                                 |
|            |                         |     |                                           | -          | Gross graduation ratio from first degree programmes (ISCED 6 and 7) in tertiary education, both sexes (%) | 120               | Medium    | -                      |                                 |
|            | Attendance of education | 4   | Enrolment in primary school               | -          | Gross enrolment ratio, primary, both sexes (%)                                                            | 191               | Very high | -                      |                                 |
|            |                         |     | Enrolment in secondary school             | -          | Gross enrolment ratio, secondary, both sexes (%)                                                          | 188               | Very high | -                      |                                 |

Supplementary material Table S2: The relation of the initial indicator set of the SCDI to the SDG indicator development (cont.)

| SCDI theme | SCDI subtheme                   | SDG | SCDI criteria                   | SDG target | SCDI indicator                                                                                                       | Data availability                                                      |           | Tier for SDG Indicator | Source     |   |
|------------|---------------------------------|-----|---------------------------------|------------|----------------------------------------------------------------------------------------------------------------------|------------------------------------------------------------------------|-----------|------------------------|------------|---|
|            |                                 |     |                                 |            |                                                                                                                      | Covered country                                                        | Level     |                        |            |   |
| Education  |                                 |     | Enrolment in tertiary school    | 4.3        | Gross enrolment ratio, tertiary, both sexes (%)                                                                      | 175                                                                    | Very high | -                      | UNESCO [9] |   |
|            | Early childhood education       | 4   | Enrolment of kindergarten       | 4.2        | Gross enrolment ratio, pre-primary, both sexes (%)                                                                   | 179                                                                    | Very high | I                      |            |   |
|            | Government support on education | 1   | Public expenditure on education | 1.a        | Government expenditure on education as % of GDP                                                                      | 178                                                                    | Very high | II                     |            |   |
|            | Gender equality                 | 4   | Gender equality in enrolment    | 4.5        | Gross enrolment ratio, pre-primary, gender parity index (GPI)                                                        | 176                                                                    | Very high | I                      |            |   |
|            |                                 |     |                                 |            | Gross enrolment ratio, primary, gender parity index (GPI)                                                            | 190                                                                    | Very high | I                      |            |   |
|            |                                 |     |                                 |            | Gross enrolment ratio, secondary, gender parity index (GPI)                                                          | 187                                                                    | Very high | I                      |            |   |
|            |                                 |     |                                 |            | Gross enrolment ratio, tertiary, gender parity index (GPI)                                                           | 171                                                                    | High      | I                      |            |   |
|            |                                 |     | Gender equality in graduation   |            | Gross graduation ratio from primary education, gender parity index (GPI)                                             | 118                                                                    | Medium    | I                      |            |   |
|            |                                 |     |                                 |            | Gross graduation ratio from lower secondary education, gender parity index (GPI)                                     | 107                                                                    | Medium    | I                      |            |   |
|            |                                 |     |                                 |            | Gross graduation ratio from first degree programmes (ISCED 6 and 7) in tertiary education, gender parity index (GPI) | 127                                                                    | Medium    | I                      |            |   |
|            |                                 |     |                                 |            | Gender equality in youth literacy                                                                                    | Youth literacy rate, population 15-24 years, gender parity index (GPI) | 152       | High                   |            | I |

Supplementary material Table S2: The relation of the initial indicator set of the SCDI to the SDG indicator development (cont.)

| SCDI theme      | SCDI subtheme           | SDG | SCDI criteria                    | SDG target | SCDI indicator                                                                                                                     | Data availability |           | Tier for SDG Indicator | Source         |
|-----------------|-------------------------|-----|----------------------------------|------------|------------------------------------------------------------------------------------------------------------------------------------|-------------------|-----------|------------------------|----------------|
|                 |                         |     |                                  |            |                                                                                                                                    | Covered country   | Level     |                        |                |
| Safety          | Violence and crime      | 16  | Juvenile delinquency             | 16.1       | Juveniles held in prisons, penal institutions or correctional institutions                                                         | 108               | Medium    | -                      | UNODC [10]     |
|                 |                         |     |                                  |            | Juveniles brought into formal contact with the police and/or criminal justice system, all crimes                                   | 108               | Medium    | -                      |                |
|                 |                         |     | Criminal victimization           | 16.1       | Intentional homicide count and rate per 100,000 population                                                                         | 195               | Top       | I                      |                |
|                 |                         |     |                                  |            | Assault and major assault rates in different countries (police recorded assaults/100,000 population)                               | 128               | Medium    | -                      |                |
|                 |                         |     | Sexual violence against children | 16.2       | Total sexual offences against children at the national level, police-recorded offences, rate per 100,000 children aged 17 or under | 102               | Medium    | II                     |                |
|                 | Birth registration      | 16  | Registration of newborns         | 16.9       | Birth registration rate                                                                                                            | 162               | High      | I                      | UNICEF [1]     |
|                 | Child labor             | 8   | Children involved in child labor | 8.7        | Percentage of children five-14 years old involved in child labor                                                                   | 112               | Medium    | I                      |                |
|                 | Child marriage          | 5   | Children married or in union     | 5.3        | Percentage of women aged 20 to 24 years who were first married or in union before ages 18                                          | 123               | Medium    | II                     |                |
|                 | Demographic structure   | 5   | Sex ratio                        | 5.1        | Sex ratio at birth                                                                                                                 | 191               | Very high | -                      | CIA [11]       |
| Economic status | Housing quality         | 7   | Risk housing                     | 7.1        | Access to electricity (% of population)                                                                                            | 191               | Very high | I                      | World Bank [5] |
|                 | Macroeconomic situation | 8   | Overall unemployment             | 8.5        | Unemployment, total (% of total labor force) (modeled ILO estimate)                                                                | 171               | High      | I                      |                |
|                 |                         |     | Youth unemployment               |            | Youth unemployment rate (% of total labor force ages 15-24)                                                                        | 170               | High      | I                      |                |

Supplementary material Table S2: The relation of the initial indicator set of the SCDI to the SDG indicator development (cont.)

| SCDI theme            | SCDI subtheme                | SDG | SCDI criteria                          | SDG target | SCDI indicator                                                     | Data availability |           | Tier for SDG Indicator | Source                 |
|-----------------------|------------------------------|-----|----------------------------------------|------------|--------------------------------------------------------------------|-------------------|-----------|------------------------|------------------------|
|                       |                              |     |                                        |            |                                                                    | Covered country   | Level     |                        |                        |
| Economic status       | Macroeconomic situation      | 10  | Income equality at societal level      | 10.1       | Income Gini coefficient                                            | 138               | Medium    | -                      | UNDP [12]              |
|                       |                              | 8   | National income                        | -          | GNI per capita, Purchasing power parity (current international \$) | 183               | Very high | -                      | World Bank [5]         |
|                       |                              | 8   | National debts                         | -          | Public debt as percentage of GDP                                   | 179               | Very high | -                      | CIA [11]               |
| Relationship          | Community relationship       | 11  | Social capital                         | 11.3       | Social Capital Ranking                                             | 140               | Medium    | -                      | Legatum Institute [13] |
| Participation         | Social media connection      | 9   | Internet access in home                | 9.c        | Proportion of households with internet access at home              | 135               | Medium    | I                      | ITU [14]               |
|                       |                              |     | Access to public media                 |            | Proportion of households with computer                             | 116               | Medium    | I                      |                        |
| Environmental aspects | Freshwater vulnerability     | 6   | Risk of depleting freshwater resources | 6.4        | Water depletion index (WDI)                                        | 192               | Very high | -                      | Berger et al. [15]     |
|                       | Renewable energy consumption | 7   | Consumption of renewable energy        | 7.2        | Renewable energy consumption (% of total final energy consumption) | 180               | Very high | I                      | World Bank [5]         |

#### Reference:

1. UNICEF Childinfo: Monitoring the situation of children and women <http://www.childinfo.org/> (accessed 11 Mar 2017).
2. Malmö University Oral Health Database <http://www.mah.se/capp/> (accessed 25 Aug 2016).
3. WHO *Preventing Suicide: A Global Imperative*; Luxembourg, 2014.
4. WHO Global Health Observatory (GHO) data <http://www.who.int/gho/en/> (accessed 10 Mar 2017).
5. World Bank World Bank Open Data <http://data.worldbank.org/> (accessed 11 Mar 2017).

6. WHO *Global status report on noncommunicable diseases 2014*; Switzerland, 2014.
7. UNICEF *The State of the World's Children 2016: A Fair Chance for Every Child*; New York, 2016.
8. UNICEF *The state of the World's Children 2015: Reimagine the Future, Innovation for Every Child*; New York, 2014.
9. UNESCO UIS.Stat <http://data.uis.unesco.org/> (accessed 11 Aug 2016).
10. UNODC Data and Analysis - Statistics <https://www.unodc.org/unodc/en/data-and-analysis/statistics/index.html> (accessed 12 Mar 2017).
11. CIA Sex ratio at birth <https://www.cia.gov/library/publications/the-world-factbook/fields/2018.html> (accessed 20 Mar 2017).
12. UNDP Income Gini coefficient <http://hdr.undp.org/en/content/income-gini-coefficient> (accessed 11 Mar 2016).
13. Legatum Institute *The Legatum Prosperity Index 2016*; London (UK), 2016.
14. ITU ITU - Statistics <http://www.itu.int/en/ITU-D/Statistics/Pages/stat/default.aspx> (accessed 19 Mar 2017).
15. Berger, M.; Van Der Ent, R.; Eisner, S.; Bach, V.; Finkbeiner, M. Water accounting and vulnerability evaluation (WAVE): Considering atmospheric evaporation recycling and the risk of freshwater depletion in water footprinting. *Environ. Sci. Technol.* **2014**, *48*, 4521–4528.
