# Supplementary material
Source: MDPI journal article supplement (https://www.mdpi.com/2071-1050/9/4/518)
Supplement: s1 [file s1 › Supplementary material_Table S3.pdf]

**Supplementary material Table S3: Numbers of indicators of the themes in different data availability levels**

| Data availability                    | Theme  |           |        |                 |              |               |                       |
|--------------------------------------|--------|-----------|--------|-----------------|--------------|---------------|-----------------------|
|                                      | Health | Education | Safety | Economic status | Relationship | Participation | Environmental aspects |
| Top data availability                | 6      | 0         | 1      | 0               | 0            | 0             | 0                     |
| Very high data availability          | 10     | 9         | 1      | 3               | 0            | 0             | 2                     |
| High data availability               | 5      | 3         | 1      | 3               | 0            | 0             | 0                     |
| Medium data availability             | 7      | 6         | 6      | 0               | 1            | 2             | 0                     |
| Low data availability                | 4      | 2         | 5      | 1               | 2            | 4             | 0                     |
| Very low data availability           | 16     | 8         | 7      | 10              | 12           | 2             | 0                     |
| No statistical data on country level | 8      | 3         | 1      | 1               | 2            | 0             | 0                     |
