# Supplementary material
Source: MDPI journal article supplement (https://www.mdpi.com/2071-1050/9/4/518)
Supplement: s1 [file s1 › Supplementary material_Table S4.pdf]

### Supplementary material 3: Subthemes and criteria of the SCDI framework

#### Subthemes and criteria of theme health

| Theme: Health                                                                                                                                                                                                                                                                                                                                                      |                                                                                                                                                                                                                                                           |                                                                                                                                                                                 |
|--------------------------------------------------------------------------------------------------------------------------------------------------------------------------------------------------------------------------------------------------------------------------------------------------------------------------------------------------------------------|-----------------------------------------------------------------------------------------------------------------------------------------------------------------------------------------------------------------------------------------------------------|---------------------------------------------------------------------------------------------------------------------------------------------------------------------------------|
| Risk behavior <sup>2</sup>                                                                                                                                                                                                                                                                                                                                         | Nutrition <sup>1,2</sup>                                                                                                                                                                                                                                  | Child mortality <sup>1</sup>                                                                                                                                                    |
| <ul style="list-style-type: none"> <li>Tobacco use<sup>2</sup></li> <li>Alcohol use<sup>2</sup></li> <li>Adolescent fertility<sup>2</sup></li> <li>Contraceptive prevalence<sup>2</sup></li> <li>Cannabis use<sup>2</sup></li> <li>Prevalence of sexual activity in youth<sup>2</sup></li> <li>Illicit drug use<sup>2</sup></li> </ul>                             | <ul style="list-style-type: none"> <li>Low birth weight<sup>1</sup></li> <li>Overweight and obesity<sup>1</sup></li> <li>Breastfeeding<sup>2</sup></li> <li>Underweight<sup>1</sup></li> <li>Stunting<sup>1</sup></li> <li>Wasting<sup>1</sup></li> </ul> | <ul style="list-style-type: none"> <li>Infant mortality<sup>1</sup></li> <li>Under-five mortality<sup>1</sup></li> <li>Neonatal mortality<sup>1</sup></li> </ul>                |
| Immunisation coverage <sup>2</sup>                                                                                                                                                                                                                                                                                                                                 | Eating and physical activity <sup>2</sup>                                                                                                                                                                                                                 | Water and sanitation <sup>2</sup>                                                                                                                                               |
| <ul style="list-style-type: none"> <li>Measles containing vaccine (MCV) immunisation<sup>2</sup></li> <li>Diphtheria tetanus toxoid and pertussis (DTP3) immunisation<sup>2</sup></li> <li>Polio (Pol3) immunisation<sup>2</sup></li> <li>Hepatitis B (HepB3) immunisation<sup>2</sup></li> <li>Bacillus Calmette-Guérin (BCG) immunisation<sup>2</sup></li> </ul> | <ul style="list-style-type: none"> <li>Physical activity<sup>2</sup></li> <li>Eating behavior<sup>2</sup></li> </ul>                                                                                                                                      | <ul style="list-style-type: none"> <li>Access to improved sanitation facilities coverage<sup>2</sup></li> <li>Access to improved drinking water coverage<sup>2</sup></li> </ul> |
|                                                                                                                                                                                                                                                                                                                                                                    | Subjective health <sup>1</sup>                                                                                                                                                                                                                            | Injury <sup>1</sup>                                                                                                                                                             |
|                                                                                                                                                                                                                                                                                                                                                                    | <ul style="list-style-type: none"> <li>Self-rated health<sup>1</sup></li> </ul>                                                                                                                                                                           | <ul style="list-style-type: none"> <li>Medically attended injuries<sup>1</sup></li> </ul>                                                                                       |
|                                                                                                                                                                                                                                                                                                                                                                    | Mental health <sup>1</sup>                                                                                                                                                                                                                                | Health expenditure <sup>2</sup>                                                                                                                                                 |
|                                                                                                                                                                                                                                                                                                                                                                    | <ul style="list-style-type: none"> <li>Suicide<sup>1</sup></li> <li>Depression<sup>1</sup></li> <li>Emotional and behavior difficulty<sup>1</sup></li> </ul>                                                                                              | <ul style="list-style-type: none"> <li>Public expenditure on health<sup>2</sup></li> <li>Health insurance coverage<sup>2</sup></li> </ul>                                       |
| Hazardous pollutant <sup>2</sup>                                                                                                                                                                                                                                                                                                                                   | Maternal health <sup>2</sup>                                                                                                                                                                                                                              | Oral health <sup>1</sup>                                                                                                                                                        |
| <ul style="list-style-type: none"> <li>Household and ambient air pollution<sup>2</sup></li> <li>PM2.5 exposure<sup>2</sup></li> <li>Family smoking<sup>2</sup></li> </ul>                                                                                                                                                                                          | <ul style="list-style-type: none"> <li>Antenatal care<sup>2</sup></li> <li>Skilled attendant at birth<sup>2</sup></li> <li>Maternal mortality<sup>2</sup></li> <li>Maternal smoking<sup>2</sup></li> </ul>                                                | <ul style="list-style-type: none"> <li>Untreated dental caries<sup>1</sup></li> </ul>                                                                                           |
| HIV <sup>1</sup>                                                                                                                                                                                                                                                                                                                                                   | Malaria <sup>1</sup>                                                                                                                                                                                                                                      | Chronic disease <sup>1</sup>                                                                                                                                                    |
| <ul style="list-style-type: none"> <li>HIV prevalence among youth<sup>1</sup></li> <li>Pregnant women living with HIV, receive medicine for preventing transmission<sup>1</sup></li> </ul>                                                                                                                                                                         | <ul style="list-style-type: none"> <li>Children under five sleeping under nets<sup>1</sup></li> <li>Children under five fever with treatment<sup>1</sup></li> </ul>                                                                                       | Disability <sup>1</sup>                                                                                                                                                         |

1, 2 respectively indicates outcome, contextual level.

Subthemes and criteria of theme education and safety

| <b>Theme: Education</b>                                                                                                                                                                                                                                                                                    |                                                                                                                                                                                                         |                                                                                                                                                                                                |
|------------------------------------------------------------------------------------------------------------------------------------------------------------------------------------------------------------------------------------------------------------------------------------------------------------|---------------------------------------------------------------------------------------------------------------------------------------------------------------------------------------------------------|------------------------------------------------------------------------------------------------------------------------------------------------------------------------------------------------|
| <b>School attainment<sup>1</sup></b>                                                                                                                                                                                                                                                                       | <b>Attendance of education<sup>2</sup></b>                                                                                                                                                              | <b>Completion of education<sup>1</sup></b>                                                                                                                                                     |
| <ul style="list-style-type: none"> <li>• Mathematical literacy<sup>1</sup></li> <li>• Reading literacy<sup>1</sup></li> <li>• Overall literacy<sup>1</sup></li> <li>• Repetition<sup>1</sup></li> </ul>                                                                                                    | <ul style="list-style-type: none"> <li>• Enrollment in primary school<sup>2</sup></li> <li>• Enrollment in secondary school<sup>2</sup></li> <li>• Enrollment in tertiary school<sup>2</sup></li> </ul> | <ul style="list-style-type: none"> <li>• Primary school completion<sup>1</sup></li> <li>• Secondary school completion<sup>1</sup></li> <li>• Tertiary school completion<sup>1</sup></li> </ul> |
| <b>Early childhood education<sup>2</sup></b>                                                                                                                                                                                                                                                               | <b>Subjective evaluation<sup>1</sup></b>                                                                                                                                                                | <b>Parent's educational qualification<sup>2</sup></b>                                                                                                                                          |
| <ul style="list-style-type: none"> <li>• Enrollment of kindergarten<sup>2</sup></li> <li>• Parents reading to young children<sup>2</sup></li> </ul>                                                                                                                                                        | <ul style="list-style-type: none"> <li>• Satisfaction of school<sup>1</sup></li> <li>• Pressure from school work<sup>1</sup></li> </ul>                                                                 | <ul style="list-style-type: none"> <li>• Parent's formal educational level<sup>2</sup></li> </ul>                                                                                              |
| <b>Gender equality<sup>2</sup></b>                                                                                                                                                                                                                                                                         | <b>Transition to employment<sup>1</sup></b>                                                                                                                                                             | <b>Government support on education<sup>2</sup></b>                                                                                                                                             |
| <ul style="list-style-type: none"> <li>• Gender equality in enrolment<sup>2</sup></li> <li>• Gender equality in graduation<sup>2</sup></li> <li>• Gender equality in youth literacy<sup>2</sup></li> </ul>                                                                                                 | <ul style="list-style-type: none"> <li>• Idle youth (15–19) not in education, training or employment<sup>1</sup></li> </ul>                                                                             | <ul style="list-style-type: none"> <li>• Public expenditure on education<sup>2</sup></li> </ul>                                                                                                |
|                                                                                                                                                                                                                                                                                                            | <b>Other participation<sup>1</sup></b>                                                                                                                                                                  | <b>Provision of vocational school<sup>2</sup></b>                                                                                                                                              |
|                                                                                                                                                                                                                                                                                                            | <ul style="list-style-type: none"> <li>• Reading pleasure<sup>1</sup></li> <li>• Extra-curricular subjects<sup>1</sup></li> </ul>                                                                       | <ul style="list-style-type: none"> <li>• Attendance of vocational education<sup>2</sup></li> </ul>                                                                                             |
| <b>Theme: Safety</b>                                                                                                                                                                                                                                                                                       |                                                                                                                                                                                                         |                                                                                                                                                                                                |
| <b>Violence and crime<sup>1,2</sup></b>                                                                                                                                                                                                                                                                    | <b>Child care arrangement<sup>2</sup></b>                                                                                                                                                               | <b>Violent discipline<sup>2</sup></b>                                                                                                                                                          |
| <ul style="list-style-type: none"> <li>• Bully in school<sup>1,2</sup></li> <li>• Juvenile delinquency<sup>1</sup></li> <li>• Fighting<sup>1</sup></li> <li>• Criminal victimisation<sup>2</sup></li> <li>• Family violence<sup>2</sup></li> <li>• Sexual violence against children<sup>2</sup></li> </ul> | <ul style="list-style-type: none"> <li>• Formal care<sup>2</sup></li> </ul>                                                                                                                             | <ul style="list-style-type: none"> <li>• Psychological aggression and/or punishment<sup>2</sup></li> </ul>                                                                                     |
|                                                                                                                                                                                                                                                                                                            | <b>Demographic structure<sup>2</sup></b>                                                                                                                                                                | <b>Birth registration<sup>2</sup></b>                                                                                                                                                          |
|                                                                                                                                                                                                                                                                                                            | <ul style="list-style-type: none"> <li>• Sex ratio at birth<sup>2</sup></li> </ul>                                                                                                                      | <ul style="list-style-type: none"> <li>• Registration of newborns<sup>2</sup></li> </ul>                                                                                                       |
| <b>Child labour<sup>2</sup></b>                                                                                                                                                                                                                                                                            | <b>Child marriage<sup>2</sup></b>                                                                                                                                                                       | <b>Female genital mutilation<sup>2</sup></b>                                                                                                                                                   |
| <ul style="list-style-type: none"> <li>• Children involved in child labour<sup>2</sup></li> </ul>                                                                                                                                                                                                          | <ul style="list-style-type: none"> <li>• Children married or in union<sup>2</sup></li> </ul>                                                                                                            | <ul style="list-style-type: none"> <li>• Girls received genital mutilation<sup>2</sup></li> </ul>                                                                                              |

1, 2 respectively indicates outcome, contextual level.

Subthemes and criteria of theme economic status, relationship, participation and environmental aspect

| Theme: Economic status                                                                                                                                                                                                          |                                                                                                                                                                                    |                                                                                                                                                                                                                                                                      |
|---------------------------------------------------------------------------------------------------------------------------------------------------------------------------------------------------------------------------------|------------------------------------------------------------------------------------------------------------------------------------------------------------------------------------|----------------------------------------------------------------------------------------------------------------------------------------------------------------------------------------------------------------------------------------------------------------------|
| Material deprivation <sup>2</sup>                                                                                                                                                                                               | Housing quality <sup>2</sup>                                                                                                                                                       | Macroeconomic situation <sup>2</sup>                                                                                                                                                                                                                                 |
| <ul style="list-style-type: none"> <li>• Fewer than ten books<sup>2</sup></li> <li>• Few educational resource<sup>2</sup></li> <li>• Low family affluence<sup>2</sup></li> <li>• Deprivation rate<sup>2</sup></li> </ul>        | <ul style="list-style-type: none"> <li>• Electricity coverage<sup>2</sup></li> <li>• Crowded household<sup>2</sup></li> <li>• Risky housing<sup>2</sup></li> </ul>                 | <ul style="list-style-type: none"> <li>• General Unemployment<sup>2</sup></li> <li>• Youth Unemployment<sup>2</sup></li> <li>• Income equality at societal level<sup>2</sup></li> <li>• National debts<sup>2</sup></li> <li>• National income<sup>2</sup></li> </ul> |
| Relative household income poverty <sup>2</sup>                                                                                                                                                                                  | Household without job <sup>2</sup>                                                                                                                                                 | Debt and financial difficulty <sup>2</sup>                                                                                                                                                                                                                           |
| <ul style="list-style-type: none"> <li>• Children living in households with income <math>\leq</math> national median<sup>2</sup></li> </ul>                                                                                     | <ul style="list-style-type: none"> <li>• Children living in jobless families<sup>2</sup></li> </ul>                                                                                |                                                                                                                                                                                                                                                                      |
| Theme: Relationship                                                                                                                                                                                                             |                                                                                                                                                                                    |                                                                                                                                                                                                                                                                      |
| Family relationship <sup>1,2</sup>                                                                                                                                                                                              | Peer relationship <sup>2</sup>                                                                                                                                                     | Community relationship <sup>2</sup>                                                                                                                                                                                                                                  |
| <ul style="list-style-type: none"> <li>• Family structure<sup>2</sup></li> <li>• Relation of parents and children<sup>1</sup></li> <li>• Family engagement<sup>2</sup></li> <li>• Satisfaction of family<sup>1</sup></li> </ul> | <ul style="list-style-type: none"> <li>• Kind and helpful peers<sup>2</sup></li> <li>• Peer engagement<sup>2</sup></li> </ul>                                                      | <ul style="list-style-type: none"> <li>• Social capital<sup>2</sup></li> <li>• Satisfaction of community<sup>1</sup></li> </ul>                                                                                                                                      |
| Theme: Participation                                                                                                                                                                                                            |                                                                                                                                                                                    |                                                                                                                                                                                                                                                                      |
| Participation in civic activity <sup>1</sup>                                                                                                                                                                                    | Social connection <sup>2</sup>                                                                                                                                                     | Voting in presidential elections <sup>1</sup>                                                                                                                                                                                                                        |
| <ul style="list-style-type: none"> <li>• Participation in community activities<sup>1</sup></li> </ul>                                                                                                                           | <ul style="list-style-type: none"> <li>• Telephone/mobile access<sup>2</sup></li> <li>• Internet access in home<sup>2</sup></li> <li>• Access to mass media<sup>2</sup></li> </ul> | <ul style="list-style-type: none"> <li>• Youth voting engagement<sup>2</sup></li> </ul>                                                                                                                                                                              |
| Theme: Environmental aspects                                                                                                                                                                                                    |                                                                                                                                                                                    |                                                                                                                                                                                                                                                                      |
| Freshwater vulnerability <sup>2</sup>                                                                                                                                                                                           | Renewable energy consumption <sup>2</sup>                                                                                                                                          |                                                                                                                                                                                                                                                                      |
| <ul style="list-style-type: none"> <li>• Risk of depleting freshwater resources<sup>2</sup></li> </ul>                                                                                                                          | <ul style="list-style-type: none"> <li>• Consumption of renewable energy<sup>2</sup></li> </ul>                                                                                    |                                                                                                                                                                                                                                                                      |

1, 2 respectively indicates outcome, contextual level.
